# Supplementary material for: Muscle atrophy and metal-on-metal hip implants: A serial MRI study of 74 hips
Source: PubMed Central journal article supplement — Acta Orthop. 2015 May 13;86(3):351–7. doi: 10.3109/17453674.2015.1006981 (PMC4443469; doi:10.3109/17453674.2015.1006981), 2015-05-13
Supplement: ORT-86-351-s7564.pdf [file ORT-86-351-s7564.pdf]

## Supplementary article data

# Muscle atrophy and metal-on-metal hip implants

## A serial MRI study of 74 hips

Reshid BERBER<sup>1</sup>, Michael KHOO<sup>1</sup>, Erica COOK<sup>2</sup>, Andrew GUPPY<sup>2</sup>, Jia HUA<sup>1,3</sup>, Jonathan MILES<sup>1</sup>, Richard CARRINGTON<sup>1</sup>, John SKINNER<sup>1</sup>, and Alister HART<sup>1</sup>

<sup>1</sup> Royal National Orthopaedic Hospital, Brockley Hill, Stanmore, Middlesex; <sup>2</sup> University of Bedfordshire, Park Square, Luton, Bedfordshire; <sup>3</sup> Middlesex University London, The Burroughs, London, UK.

Correspondence: reshidb@gmail.com

Submitted 2014-05-29. Accepted 2014-10-31.

Table 1. Summary of implants and clinical details for all cases included in the study (n = 74)

| Age | Sex | Age at implant | Time a | Time b | HRA/THR | Cr ppb | Co ppb | OHS | Age | Sex | Age at implant | Time a | Time b | HRA/THR | Cr ppb | Co ppb | OHS |
|-----|-----|----------------|--------|--------|---------|--------|--------|-----|-----|-----|----------------|--------|--------|---------|--------|--------|-----|
| 49  | M   | 44             | 39     | 5      | HRA     | 1.8    | 0.9    | 33  | 50  | F   | 46             | 28     | 12     | HRA     | 4.4    | 3.7    | 14  |
| 71  | F   | 64             | 65     | 8      | THR     | 7.4    | 44.8   | 42  | 48  | M   | 41             | 59     | 16     | THR     | 3.3    | 3.5    | 9   |
| 58  | M   | 50             | 66     | 4      | HRA     | 5.7    | 8.6    |     | 48  | M   | 39             | 80     | 16     | HRA     | 3.3    | 3.5    | 9   |
| 58  | M   | 50             | 69     | 4      | HRA     | 5.7    | 8.6    |     | 83  | F   | 75             | 78     | 11     | THR     | 4.4    | 21.7   | 48  |
| 57  | F   | 49             | 62     | 17     | HRA     | 1.4    | 1.1    | 23  | 74  | M   | 63             | 110    | 9      | HRA     | 0.6    | 1.1    | 44  |
| 59  | F   | 49             | 95     | 5      | HRA     | 45.4   | 89.7   | 46  | 47  | F   | 36             | 104    | 11     | HRA     | 10.2   | 8.1    | 34  |
| 59  | F   | 47             | 122    | 5      | HRA     | 45.4   | 89.7   | 46  | 47  | F   | 36             | 104    | 11     | HRA     | 10.2   | 8.1    | 34  |
| 75  | M   | 67             | 69     | 4      | HRA     | 2.6    | 3.2    | 17  | 64  | M   | 57             | 51     | 29     | HRA     | 1.5    | 1.7    | 36  |
| 55  | M   | 51             | 14     | 7      | HRA     | 1.7    | 0.2    | 42  | 61  | F   | 51             | 100    | 15     | HRA     | 2.8    | 2.5    | 18  |
| 62  | F   | 55             | 72     | 5      | THR     | 3.8    | 8.4    | 47  | 61  | F   | 51             | 97     | 15     | HRA     | 2.8    | 2.5    | 19  |
| 62  | F   | 56             | 60     | 5      | THR     | 3.8    | 8.4    | 47  | 69  | M   | 59             | 106    | 11     | HRA     | 4.0    | 3.8    | 41  |
| 49  | M   | 41             | 79     | 6      | THR     | 1.5    | 4.1    | 10  | 69  | M   | 65             | 27     | 11     | HRA     | 4.0    | 3.8    | 41  |
| 63  | F   | 55             | 60     | 18     | HRA     | 3.5    | 2.6    | 17  | 66  | F   | 59             | 71     | 6      | HRA     | 8.7    | 4.3    | 28  |
| 70  | F   | 66             | 34     | 5      | THR     | 2.9    | 4.6    | 40  | 42  | F   | 36             | 58     | 8      | HRA     | 13.4   | 11.5   |     |
| 60  | F   | 54             | 65     | 3      | THR     | 7.1    | 4.4    | 12  | 41  | M   | 36             | 42     | 7      | HRA     | 1.6    | 1.0    | 41  |
| 56  | F   | 50             | 25     | 38     | HRA     | 10.2   | 10.4   | 40  | 41  | M   | 36             | 42     | 7      | HRA     | 1.6    | 1.0    | 41  |
| 52  | F   | 46             | 6      | 45     | THR     | 6.3    | 8.4    | 34  | 53  | M   | 42             | 131    | 7      | HRA     | 12.1   | 11.9   | 23  |
| 55  | F   | 47             | 69     | 14     | THR     | 12.3   | 16.9   | 30  | 53  | M   | 43             | 119    | 7      | HRA     | 12.1   | 11.9   | 23  |
| 55  | F   | 47             | 65     | 14     | THR     | 12.3   | 16.9   | 30  | 80  | F   | 71             | 81     | 18     | THR     | 24.4   | 71.4   | 35  |
| 65  | F   | 55             | 108    | 6      | HRA     | 1.1    | 1.4    | 41  | 60  | F   | 52             | 76     | 14     | THR     | 13.4   | 18.6   | 16  |
| 28  | M   | 23             | 51     | 5      | HRA     | 38.2   | 35.8   | 48  | 60  | F   | 54             | 53     | 14     | THR     | 13.4   | 18.6   | 16  |
| 60  | M   | 51             | 79     | 10     | HRA     | 3.5    | 2.6    | 7   | 48  | M   | 39             | 98     | 4      | THR     | 5.1    | 10.5   | 37  |
| 60  | M   | 56             | 26     | 8      | HRA     | 3.0    | 3.8    | 25  | 48  | M   | 39             | 87     | 4      | THR     | 5.1    | 10.5   | 37  |
| 62  | M   | 59             | 21     | 4      | HRA     | 0.2    | 1.2    | 24  | 70  | F   | 65             | 37     | 26     | THR     | 0.8    | 0.7    | 43  |
| 49  | F   | 42             | 55     | 14     | HRA     | 25.4   | 50.8   | 8   | 60  | M   | 54             | 38     | 5      | HRA     | 2.3    | 1.8    | 5   |
| 49  | F   | 42             | 59     | 14     | HRA     | 25.4   | 50.8   | 8   | 60  | M   | 56             | 35     | 4      | HRA     | 2.3    | 1.8    |     |
| 69  | M   | 60             | 88     | 6      | HRA     | 9.7    | 11.2   | 16  | 41  | M   | 32             | 84     | 12     | HRA     | 17.8   | 58.0   | 37  |
| 61  | M   | 49             | 122    | 12     | HRA     | 1.2    | 0.8    | 37  | 41  | M   | 32             | 84     | 12     | THR     | 17.8   | 58.0   | 40  |
| 24  | M   | 18             | 38     | 22     | THR     | 1.3    | 0.9    | 27  | 77  | F   | 70             | 68     | 8      | THR     | 22.0   | 9.0    | 29  |
| 67  | F   | 63             | 17     | 25     | THR     | 1.8    | 1.5    | 38  | 59  | M   | 52             | 74     | 9      | THR     | 0.9    | 1.8    | 13  |
| 55  | F   | 45             | 89     | 15     | HRA     | 2.1    | 2.2    | 34  | 63  | F   | 56             | 68     | 10     | THR     | 12.6   | 27.3   | 20  |
| 42  | F   | 36             | 62     | 11     | HRA     | 1.9    | 1.3    | 18  | 72  | M   | 67             | 55     | 6      | THR     | 13.6   | 22.5   | 34  |
| 49  | F   | 42             | 64     | 10     | THR     | 4.1    | 7.1    | 32  | 70  | F   | 64             | 58     | 8      | HRA     | 9.7    | 8.3    | 40  |
| 62  | F   | 54             | 70     | 14     | HRA     | 3.5    | 1.4    | 36  | 59  | M   | 52             | 69     | 11     | THR     | 3.2    | 6.6    | 36  |
| 57  | F   | 48             | 97     | 2      | HRA     | 10.3   | 11.4   | 43  | 59  | F   | 53             | 59     | 11     | THR     | 10.4   | 16.9   | 39  |
| 57  | F   | 48             | 97     | 2      | HRA     | 10.3   | 11.4   | 43  | 59  | F   | 52             | 67     | 11     | THR     | 10.4   | 16.9   | 30  |
| 50  | F   | 44             | 52     | 12     | HRA     | 4.4    | 3.7    | 14  | 53  | F   | 48             | 41     | 14     | HRA     | 8.4    | 3.9    | 45  |

Time a = Months from surgery to first MRI  
Time b = Months between MRI scans  
HRA = hip resurfacing arthroplasty

THR = total hip replacement,  
Cr = chromium, Co = cobalt, ppb = parts per billion,  
OHS = Oxford hip score.

**Table 3. Summary of muscle atrophy findings in 74 patients who underwent 2 MRI scans with a mean interval of 11 months**

| Muscle                   | A           | B             | p-value |
|--------------------------|-------------|---------------|---------|
| Iliopsoas                | 0.08 (0.49) | 1.42 (74)     | 0.2     |
| Gluteus minimus          | 0.12 (0.33) | 3.18 (74)     | 0.002   |
| Gluteus medius anterior  | 0.07 (0.34) | 1.69 (74)     | 0.1     |
| Gluteus medius middle    | 0.05 (0.28) | 1.65 (74)     | 0.1     |
| Gluteus medius posterior | 0.08 (0.28) | 2.54 (74)     | 0.01    |
| Gluteus medius inferior  | 0.10 (0.46) | 2.04 (74)     | 0.05    |
| Gluteus maximus          | 0 0         | No difference | N/A     |

A Change (SD) in muscle atrophy between MRI 1 and 2  
 B t-test comparing 2 MRI scans (df)

**Table 4. Summary of soft-tissue findings in 74 patients who underwent 2 MRI scans with a mean interval of 11 months**

| Soft tissue abnormality             | Change (SD) in mean score between MRI 1 and 2 | t-test (df) | p-value |
|-------------------------------------|-----------------------------------------------|-------------|---------|
| Bursal fluid                        | 0.03 (0.23)                                   | 1.00 (74)   | 0.3     |
| Tendon disruption                   | 0.02 (0.16)                                   | 1.42 (74)   | 0.2     |
| Pseudotumor presence                | 0.04 (0.20)                                   | 1.76 (74)   | 0.08    |
| Pseudotumor frequency               | 0.10 (0.46)                                   | 2.04 (74)   | 0.05    |
| Pseudotumor grade                   | 0.18 (0.63)                                   | 2.41 (74)   | 0.02    |
| Pseudotumor size (cm <sup>3</sup> ) | 13.97 (101.87)                                | 1.18 (74)   | 0.2     |

**Table 5. Summary of clinical details for patients found to have (A) progressive atrophy of the posterior gluteus medius muscle and those with (B) complete abductor tendon disruption with associated pseudotumors**

| Sex                                                                         | Age at implant | Months to first MRI | Cr ppb | Co ppb | OHS |
|-----------------------------------------------------------------------------|----------------|---------------------|--------|--------|-----|
| <b>A. Patients with progressive posterior gluteus medius muscle atrophy</b> |                |                     |        |        |     |
| F                                                                           | 64             | 65                  | 7.4    | 44.8   | 42  |
| F                                                                           | 47             | 69                  | 12.3   | 16.9   | 30  |
| F                                                                           | 42             | 59                  | 25.4   | 50.8   | 8   |
| F                                                                           | 46             | 28                  | 4.4    | 3.7    | 14  |
| F                                                                           | 36             | 104                 | 10.2   | 8.1    | 34  |
| M                                                                           | 52             | 69                  | 3.2    | 6.6    | 36  |
| <b>B. Patients with tendon disruption</b>                                   |                |                     |        |        |     |
| M                                                                           | 67             | 69                  | 2.6    | 3.2    | 17  |
| M                                                                           | 51             | 14                  | 1.7    | 0.2    | 42  |
| F                                                                           | 50             | 25                  | 10.2   | 10.4   | 40  |
| F                                                                           | 42             | 37                  | 25.4   | 50.8   | 8   |
| M                                                                           | 67             | 55                  | 13.6   | 22.5   | 34  |
| F                                                                           | 48             | 41                  | 8.4    | 3.9    | 45  |

Cr = chromium, Co = cobalt, ppb = parts per billion, OHS = Oxford hip score.

**Table 6. Summary of ANOVA interaction scores between muscle atrophy change and various demographic and clinical variables. Only significant p-values are shown**

| Soft tissue              | Implant type | Age   | Gender | Co    | Cr    | OHS   |
|--------------------------|--------------|-------|--------|-------|-------|-------|
| Iliopsoas                | 0.068        | 0.515 | 0.449  | 0.384 | 0.359 | 0.598 |
| Gluteus minimus          | 0.058        | 0.024 | 0.433  | 0.127 | 0.099 | 0.738 |
| Gluteus medius anterior  | 0.144        | 0.440 | 0.432  | 0.373 | 0.382 | 0.790 |
| Gluteus medius middle    | 0.682        | 0.161 | 0.022  | 0.695 | 0.386 | 0.973 |
| Gluteus medius posterior | 0.528        | 0.953 | 0.175  | 0.329 | 0.369 | 0.922 |
| Gluteus medius inferior  | 0.036        | 0.693 | 0.815  | 0.871 | 0.863 | 0.713 |
| Gluteus medius whole     | 0.078        | 0.770 | 0.161  | 0.605 | 0.586 | 0.858 |
| Gluteus maximus          | a            | a     | a      | a     | a     | a     |

Co = cobalt, Cr = chromium, OHS = Oxford hip score.  
 a unable to be assessed as no change in underlying muscle atrophy scores.
